# Supplementary material for: Elucidating Spirocerca lupi spread in the Americas by using phylogenetic and phylogeographic analyses
Source: Front Parasitol. 2023 Sep 27;2:1249593. doi: 10.3389/fpara.2023.1249593 (PMC11731684; doi:10.3389/fpara.2023.1249593)
Supplement: Supplementary file 4 [file Table_3.xlsx]

## Sheet: MatrixOutput
		2	3	4	5	6	7	8	9	10	11	12	13	14	15	16	17	18	19	20	21	22	23	24	25	26	27	28	29	30
1	Spirocerca_lupi_/_Costa_Rica_/_Dog_/_Isolate_CR6_{America}
2	Spirocerca_lupi_/_Costa_Rica_/_Dog_/_Isolate_CR2_{America}	0
3	Spirocerca_lupi_/_Costa_Rica_/_Dog_/_Isolate_CR5_{America}	0.00645161	0.00645161
4	Spirocerca_lupi_/_Costa_Rica_/_Dog_/_Isolate_CR3_{America}	0	0	0.00645161
5	Spirocerca_lupi_/_Costa_Rica_/_Dog_/_Isolate_CR4_{America}	0.00645161	0.00645161	0	0.00645161
6	Spirocerca_lupi_/_Costa_Rica_/_Dog_/_Isolate_CR1_{America}	0.00645161	0.00645161	0	0.00645161	0
7	Spirocerca_lupi_/_USA_/_Dog_/_Isolate_Tx_{America}	0	0	0.00645161	0	0.00645161	0.00645161
8	Spirocerca_lupi_/_Mexico_/_Dog_/_Isolate_Mx_{America}	0.00322581	0.00322581	0.00322581	0.00322581	0.00322581	0.00322581	0.00322581
9	KY634868.1_Spirocerca_lupi_/_Peru_/_Andean_fox_/_isolate_F1_{Israel}	0.00322581	0.00322581	0.00322581	0.00322581	0.00322581	0.00322581	0.00322581	0.00645161
10	KY634870.1_Spirocerca_lupi_/_Peru_/_Andean_fox_/_isolate_F2_{Israel}	0.00322581	0.00322581	0.00322581	0.00322581	0.00322581	0.00322581	0.00322581	0.00645161	0
11	MH633995.1_Spirocerca_lupi_/_Israel_/_Dog_/_Specimen_A_{Israel}	0.00645161	0.00645161	0.0129032	0.00645161	0.0129032	0.0129032	0.00645161	0.00967742	0.00967742	0.00967742
12	MH633997.1_Spirocerca_lupi_/_Israel_/_Dog_/_Specimen_C_{Israel}	0.00645161	0.00645161	0.0129032	0.00645161	0.0129032	0.0129032	0.00645161	0.00967742	0.00967742	0.00967742	0
13	MH633998.1_Spirocerca_lupi_/_Israel_/_Dog_/_Specimen_E_{Israel}	0.00645161	0.00645161	0.0129032	0.00645161	0.0129032	0.0129032	0.00645161	0.00967742	0.00967742	0.00967742	0	0
14	MH633996.1_Spirocerca_lupi_/_Israel_/_Dog_/_Specimen_B_{Israel}	0.00645161	0.00645161	0.0129032	0.00645161	0.0129032	0.0129032	0.00645161	0.00967742	0.00967742	0.00967742	0	0	0
15	MH634000.1_Spirocerca_lupi_/_Israel_/_Dog_/_Specimen_G_{Israel}	0.016129	0.016129	0.0225806	0.016129	0.0225806	0.0225806	0.016129	0.0193548	0.0193548	0.0193548	0.00967742	0.00967742	0.00967742	0.00967742
16	MH634005.1_Spirocerca_lupi_/_South_Africa_/_Dog_/_Specimen_L	0.016129	0.016129	0.0225806	0.016129	0.0225806	0.0225806	0.016129	0.0193548	0.0193548	0.0193548	0.00967742	0.00967742	0.00967742	0.00967742	0.0193548
17	MH634004.1_Spirocerca_lupi_/_South_Africa_/_Dog_/_Specimen_K	0.0483871	0.0483871	0.0548387	0.0483871	0.0548387	0.0548387	0.0483871	0.0516129	0.0516129	0.0516129	0.0419355	0.0419355	0.0419355	0.0419355	0.0451613	0.0322581
18	MH634002.1_Spirocerca_lupi_/_South_Africa_/_Dog_/_Specimen_I	0.0419355	0.0419355	0.0483871	0.0419355	0.0483871	0.0483871	0.0419355	0.0451613	0.0451613	0.0451613	0.0354839	0.0354839	0.0354839	0.0354839	0.0387097	0.0258065	0.00645161
19	MH634009.1_Spirocerca_lupi_/_India_/_Dog_/_Specimen_P	0.0419355	0.0419355	0.0483871	0.0419355	0.0483871	0.0483871	0.0419355	0.0451613	0.0451613	0.0451613	0.0419355	0.0419355	0.0419355	0.0419355	0.0387097	0.0322581	0.0387097	0.0387097
20	MH634010.1_Spirocerca_lupi_/_India_/_Dog_/_Specimen_Q	0.0419355	0.0419355	0.0483871	0.0419355	0.0483871	0.0483871	0.0419355	0.0451613	0.0451613	0.0451613	0.0419355	0.0419355	0.0419355	0.0419355	0.0387097	0.0322581	0.0387097	0.0387097	0
21	MH634008.1_Spirocerca_lupi_/_India_/_Dog_/_Specimen_O	0.0419355	0.0419355	0.0483871	0.0419355	0.0483871	0.0483871	0.0419355	0.0451613	0.0451613	0.0451613	0.0419355	0.0419355	0.0419355	0.0419355	0.0387097	0.0322581	0.0387097	0.0387097	0	0
22	MH634006.1_Spirocerca_lupi_/_India_/_Dog_/_Specimen_M	0.0419355	0.0419355	0.0483871	0.0419355	0.0483871	0.0483871	0.0419355	0.0451613	0.0451613	0.0451613	0.0419355	0.0419355	0.0419355	0.0419355	0.0387097	0.0322581	0.0387097	0.0387097	0	0	0
23	MH634007.1_Spirocerca_lupi_/_India_/_Dog_/_Specimen_N	0.0419355	0.0419355	0.0483871	0.0419355	0.0483871	0.0483871	0.0419355	0.0451613	0.0451613	0.0451613	0.0419355	0.0419355	0.0419355	0.0419355	0.0387097	0.0322581	0.0387097	0.0387097	0	0	0	0
24	NC021135.1_Spirocerca_lupi_/_China_/_Dog	0.0451613	0.0451613	0.0516129	0.0451613	0.0516129	0.0516129	0.0451613	0.0483871	0.0483871	0.0483871	0.0451613	0.0451613	0.0451613	0.0451613	0.0419355	0.0354839	0.0419355	0.0419355	0.00322581	0.00322581	0.00322581	0.00322581	0.00322581
25	MH634011.1_Spirocerca_lupi_/_Hungary_/_Dog_/_Specimen_AA	0.0709677	0.0709677	0.0645161	0.0709677	0.0645161	0.0645161	0.0709677	0.0677419	0.0677419	0.0677419	0.0645161	0.0645161	0.0645161	0.0645161	0.0677419	0.0612903	0.0741935	0.0741935	0.0741935	0.0741935	0.0741935	0.0741935	0.0741935	0.0774194
26	MH634012.1_Spirocerca_lupi_/_Hungary_/_Dog_/_Specimen_CA	0.0741935	0.0741935	0.0677419	0.0741935	0.0677419	0.0677419	0.0741935	0.0709677	0.0709677	0.0709677	0.0677419	0.0677419	0.0677419	0.0677419	0.0709677	0.0645161	0.0774194	0.0774194	0.0709677	0.0709677	0.0709677	0.0709677	0.0709677	0.0741935	0.00645161
27	MH633992.1_Spirocerca_vulpis_/_Spain_/_Red_fox_/_Specimen_T	0.0516129	0.0516129	0.0516129	0.0516129	0.0516129	0.0516129	0.0516129	0.0548387	0.0483871	0.0483871	0.0516129	0.0516129	0.0516129	0.0516129	0.0548387	0.0548387	0.0774194	0.0709677	0.0677419	0.0677419	0.0677419	0.0677419	0.0677419	0.0709677	0.083871	0.0806452
28	MH633993.1_Spirocerca_vulpis_/_Spain_/_Red_fox_/_Specimen_U	0.0516129	0.0516129	0.0516129	0.0516129	0.0516129	0.0516129	0.0516129	0.0548387	0.0483871	0.0483871	0.0516129	0.0516129	0.0516129	0.0516129	0.0548387	0.0548387	0.0774194	0.0709677	0.0677419	0.0677419	0.0677419	0.0677419	0.0677419	0.0709677	0.083871	0.0806452	0
29	MH633991.1_Spirocerca_vulpis_/_Spain_/_Red_fox_/_Specimen_S	0.0548387	0.0548387	0.0548387	0.0548387	0.0548387	0.0548387	0.0548387	0.0580645	0.0516129	0.0516129	0.0548387	0.0548387	0.0548387	0.0548387	0.0580645	0.0580645	0.0806452	0.0741935	0.0645161	0.0645161	0.0645161	0.0645161	0.0645161	0.0677419	0.0806452	0.0774194	0.00967742	0.00967742
30	MH634014.1_Spirocerca_vulpis_/_Bosnia_and_Herzegovina_/_Dog_/_Specimen_FA	0.0516129	0.0516129	0.0516129	0.0516129	0.0516129	0.0516129	0.0516129	0.0548387	0.0483871	0.0483871	0.0516129	0.0516129	0.0516129	0.0516129	0.0548387	0.0548387	0.0774194	0.0709677	0.0677419	0.0677419	0.0677419	0.0677419	0.0677419	0.0709677	0.083871	0.0806452	0	0	0.00967742

## Sheet: Caption
Table. Estimates of Evolutionary Divergence between Sequences
The number of base differences per site from between sequences are shown. This analysis involved 30 nucleotide sequences. Codon positions included were 1st+2nd+3rd+Noncoding. All ambiguous positions were removed for each sequence pair (pairwise deletion option). There were a total of 310 positions in the final dataset. Evolutionary analyses were conducted in MEGA11 [1]
1. Tamura K., Stecher G., and Kumar S. (2021). MEGA 11: Molecular Evolutionary Genetics Analysis Version 11. Molecular Biology and Evolution https://doi.org/10.1093/molbev/msab120.
Disclaimer: Although utmost care has been taken to ensure the correctness of the caption, the caption text is provided "as is" without any warranty of any kind. Authors advise the user to carefully check the caption prior to its use for any purpose and report any errors or problems to the authors immediately (www.megasoftware.net). In no event shall the authors and their employers be liable for a…
